# Supplementary material
Source: Springer Nature journal article supplement (https://www.springermedizin.de/resource/supplementary/12936_2012_2533_MOESM5_ESM.pdf/9543200)

Biopesticide coverage 80%

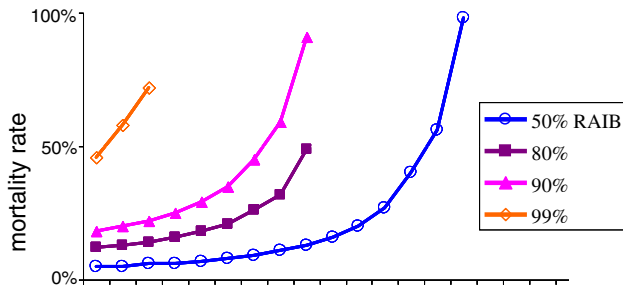

Biopesticide coverage 50%

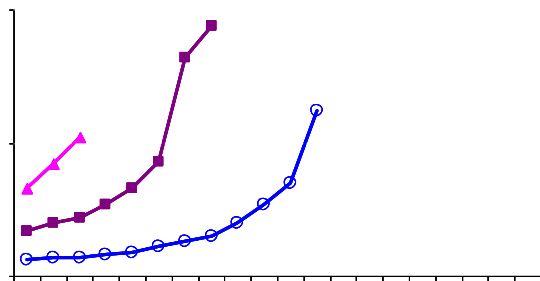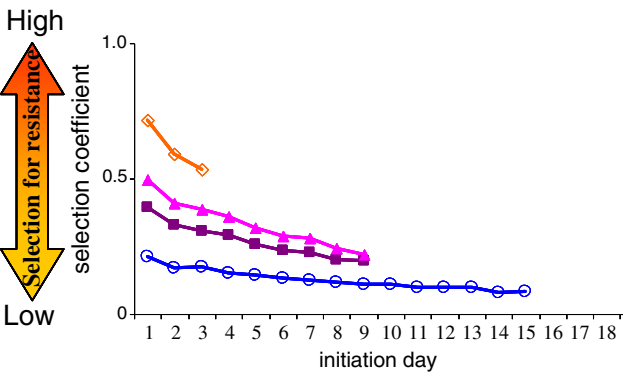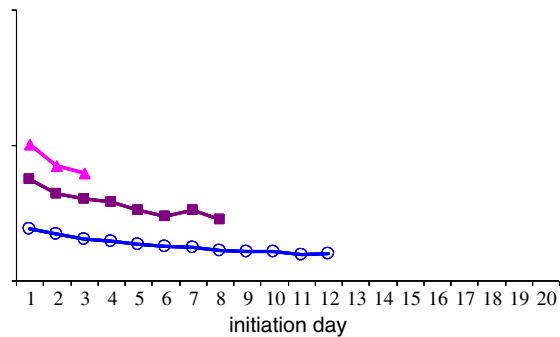

Supplement: MOESM5 [file 9543200]
